# Supplementary material for: Biomarkers of bleeding and venous thromboembolism in patients with acute leukemia
Source: PubMed Central journal article supplement (PMC10615001; doi:10.1101/2023.10.18.23297216), 2023-10-19
Supplement: media-1.pdf [file media-1.pdf]

## Supplementary materials

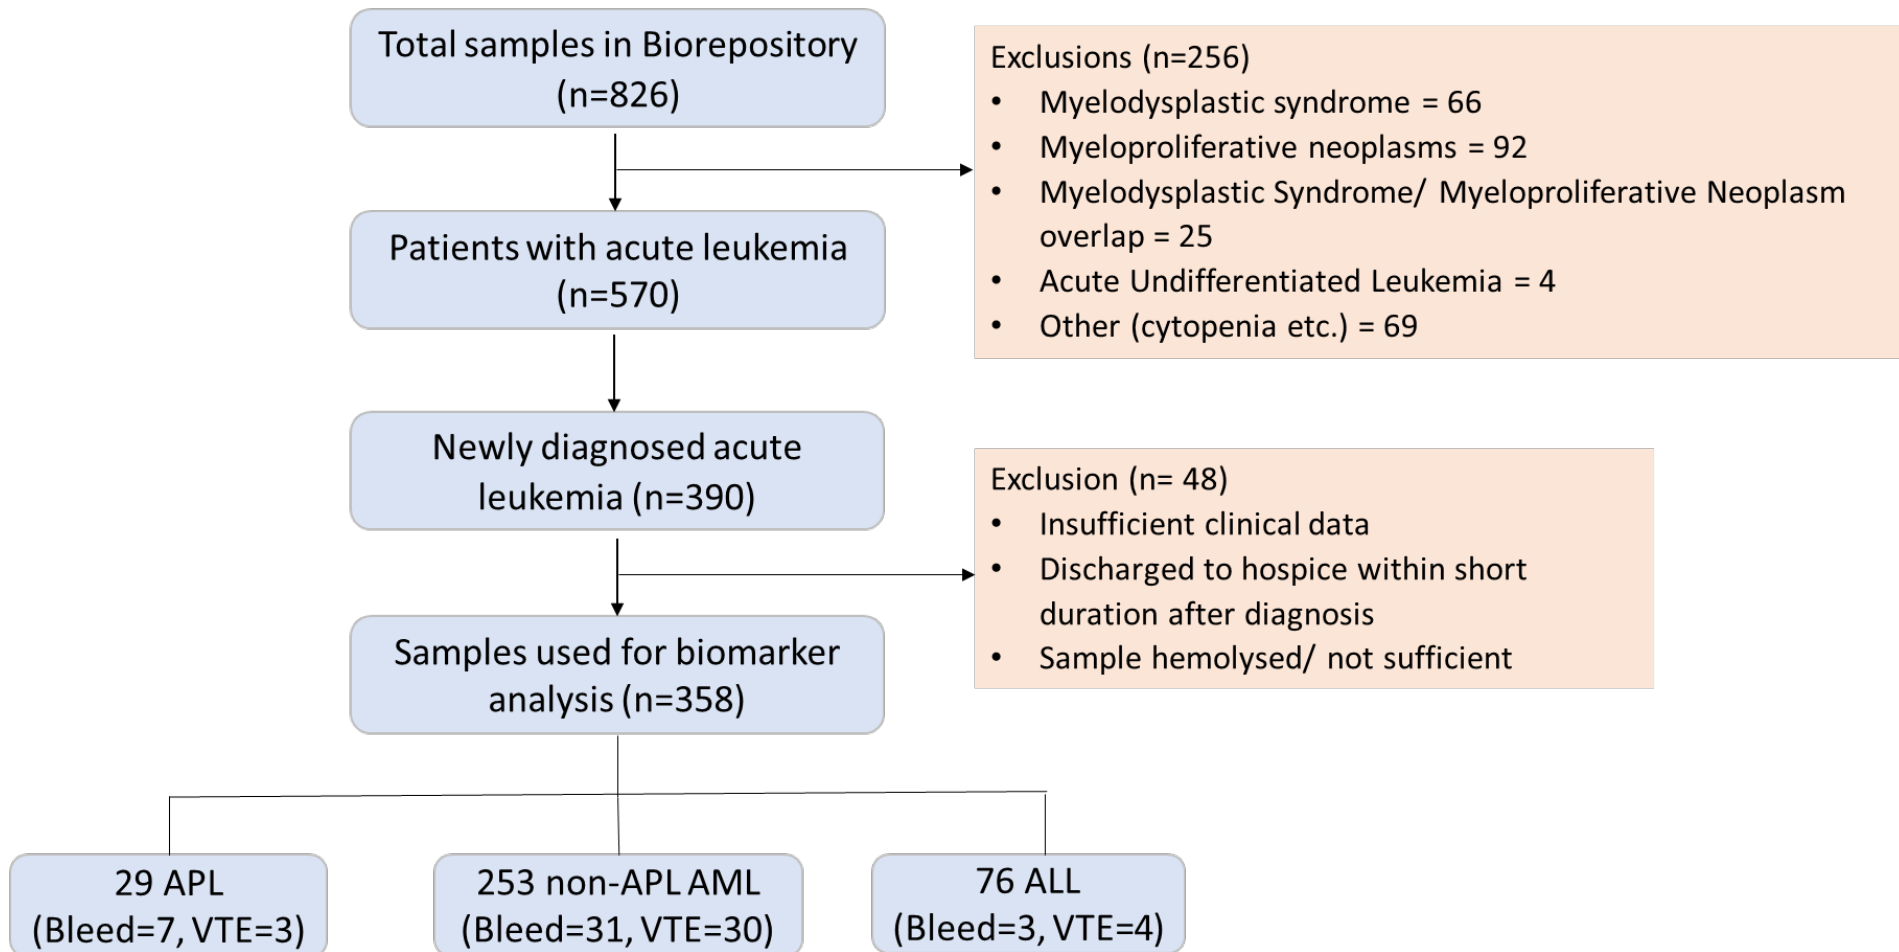

**Supplementary Figure 1. Flow chart to demonstrate inclusion and exclusion of patients in the study.**

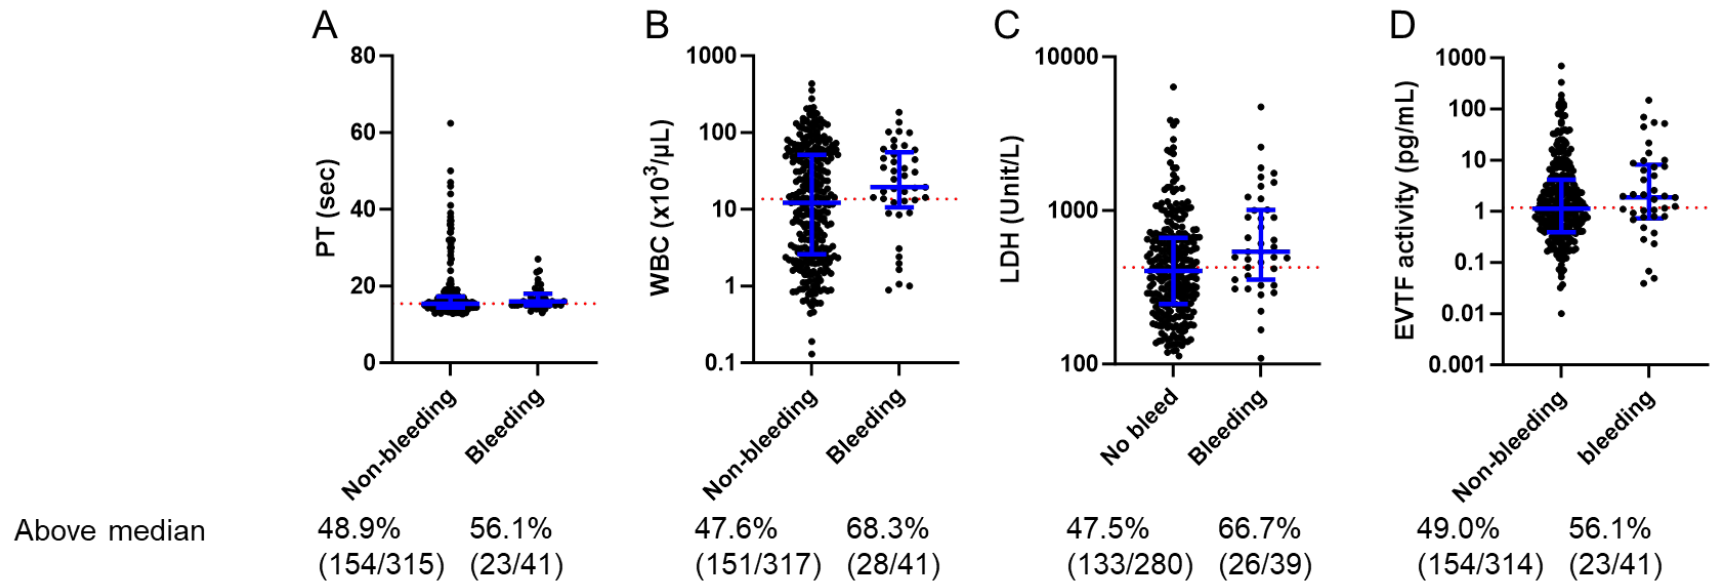

**Supplementary Figure 2. Levels of biomarkers between acute leukemia patients with and without bleeding.** (A) PT, (B) WBC, (C) LDH and (D) EVTF activity levels in acute leukemia patients with and without bleeding are shown. Blue lines indicate median  $\pm$  interquartile range. Red dotted lines indicate the median level of all patients.

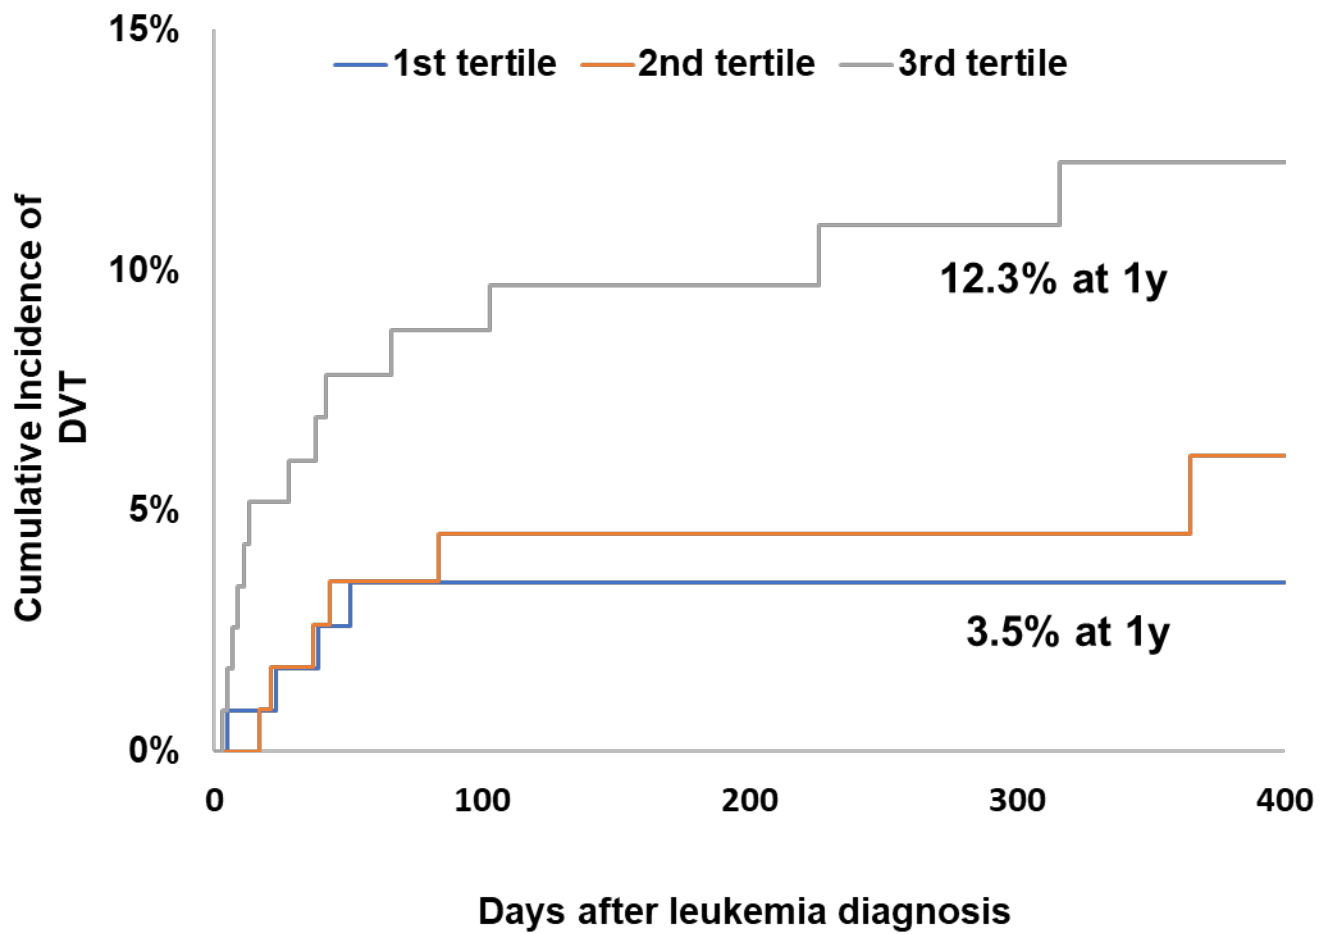

Supplementary Figure 3. Cumulative incidence of deep vein thrombosis by tertiles of plasminogen activator inhibitor-1 levels.

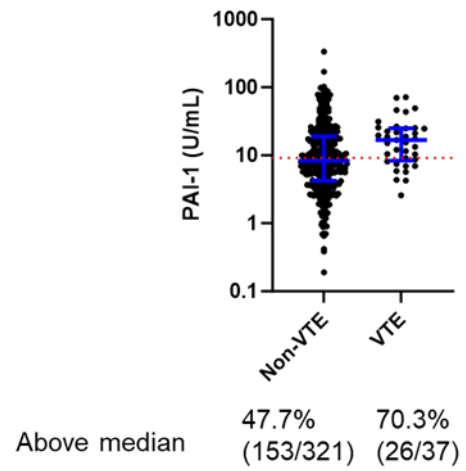

**Supplementary Figure 4. Levels of PAI-1 in acute leukemia patients with and without VTE.** Blue line indicates median  $\pm$  interquartile range. Red dotted line indicates the median level of all patients.

**Supplementary Table 1. Definitions for disseminated intravascular coagulation, bleeding, and venous thromboembolism outcomes.**

| Outcome                                      | Definition                                                                                                                                                                                                                                                                                                                                                                                                                                                                                                                                                                                                                                                                                                                                                                                                                             |
|----------------------------------------------|----------------------------------------------------------------------------------------------------------------------------------------------------------------------------------------------------------------------------------------------------------------------------------------------------------------------------------------------------------------------------------------------------------------------------------------------------------------------------------------------------------------------------------------------------------------------------------------------------------------------------------------------------------------------------------------------------------------------------------------------------------------------------------------------------------------------------------------|
| Disseminated intravascular coagulation (DIC) | Defined according to the International Society for Thrombosis and Haemostasis (ISTH) criteria and score $\geq 5$ was defined as overt DIC and score $< 5$ as no-DIC: <ul style="list-style-type: none"> <li>- Platelet count (<math>\geq 100 \times 10^3/\mu\text{L}</math> = 0; <math>50-99 \times 10^3/\mu\text{L}</math> = 1; <math>&lt; 50 \times 10^3/\mu\text{L}</math> = 2)</li> <li>- Fibrinogen level (<math>\geq 100</math> mg/dL = 0; <math>&lt; 100</math> mg/dL = 1)</li> <li>- Prothrombin time (PT) prolongation above the upper limit of normal (ULN) range (<math>&lt; 3</math> seconds = 0; 3-6 seconds = 1; <math>&gt; 6</math> seconds = 2)</li> <li>- D dimer (<math>&lt; 2</math> times ULN normal [480 ng/mL] = 0; 2-4 times ULN (480-960 ng/mL) = 2; <math>&gt; 4</math> times ULN (960 ng/mL) = 3]</li> </ul> |
| Major Bleeding                               | Defined according to the ISTH classification: <ul style="list-style-type: none"> <li>- Fatal bleeding</li> <li>- Symptomatic bleeding in critical site/ organ including intracranial, intra-spinal, intraocular, retroperitoneal, intra-articular, pericardial, and intramuscular bleeding with compartment syndrome</li> <li>- Bleeding causing drop in hemoglobin level of <math>\geq 2</math> g/dL or leading to transfusion of <math>\geq 2</math> units of whole blood or red cells</li> </ul>                                                                                                                                                                                                                                                                                                                                    |
| Clinically relevant non major bleeding       | Defined according to the ISTH classification: <ul style="list-style-type: none"> <li>- Bleeding requiring medical intervention</li> <li>- Bleeding resulting in hospitalization</li> <li>- Bleeding prompting face-to-face evaluation</li> <li>- Not fulfilling criteria for major bleeding</li> </ul>                                                                                                                                                                                                                                                                                                                                                                                                                                                                                                                                 |
| Deep vein thrombosis (DVT)                   | <ul style="list-style-type: none"> <li>- Acute symptomatic or incidental lower or upper extremity DVT</li> <li>- Catheter related DVT</li> <li>- Acute symptomatic or incidental visceral vein thrombosis</li> <li>- Acute symptomatic or incidental cerebral vein thrombosis</li> </ul>                                                                                                                                                                                                                                                                                                                                                                                                                                                                                                                                               |
| Pulmonary embolism (PE)                      | <ul style="list-style-type: none"> <li>- Acute symptomatic PE</li> <li>- Acute incidental PE of the segmental or more proximal pulmonary arterial branches</li> </ul>                                                                                                                                                                                                                                                                                                                                                                                                                                                                                                                                                                                                                                                                  |
| Superficial vein thrombosis                  | <ul style="list-style-type: none"> <li>- Acute symptomatic lower or upper extremity thrombosis involving superficial vein</li> </ul>                                                                                                                                                                                                                                                                                                                                                                                                                                                                                                                                                                                                                                                                                                   |

**Supplementary Table 2. Comparisons between acute leukemia patients with high and mid to low EVTF activity.**

| <b>Parameters</b>                      | <b>Mid to Low EVTF (n=322)<br/>[Median (range)]</b> | <b>High EVTF (n =36)<br/>[Median (range)]</b> | <b>P value</b> |
|----------------------------------------|-----------------------------------------------------|-----------------------------------------------|----------------|
| WBC count (x 10 <sup>3</sup> /μL)      | 11,580 [130-435,910]                                | 59,085 [2,370-171,050]                        | <0.0001        |
| Peripheral blood blast cell %          | 56 [0-97]                                           | 78.3 [37-96]                                  | <0.0001        |
| D-dimer (ng/mL)                        | 1,138 [135-20,000]                                  | 7,884 [230-20,000]                            | <0.0001        |
| Platelet count (x 10 <sup>3</sup> /μL) | 47,700 [3,400-859,000]                              | 39,600 [7,100-200,000]                        | 0.2488         |

**Supplementary Table 3. Comparisons between APL patients with and without overt DIC.**

| Characteristics                        | No-DIC (n=3)<br>[median (range)] | Overt DIC (n=26)<br>[median (range)] | P value       |
|----------------------------------------|----------------------------------|--------------------------------------|---------------|
| EVTF activity (pg/mL)                  | 1.1 (0.7-3.5)                    | 9.3 (0-188.1)                        | <b>0.0353</b> |
| PS+EVs (nM)                            | 54.8 (14.4-67.6)                 | 31.0 (7.5-132.7)                     | >0.9999       |
| cfDNA (ng/mL)                          | 985.3 (868-1,103)                | 1,144 (799.8-14,766)                 | NA            |
| H3Cit-DNA complex (ng/mL)              | 26.9 (0-32.9)                    | 19.5 (0-424.1)                       | 0.9087        |
| PAP (ng/mL)                            | 1,168 (97-15,179)                | 6,131 (133-15,349)                   | 0.8666        |
| tPA (ng/mL)                            | 0.3 (0-0.9)                      | 0 (0-3.5)                            | 0.0999        |
| PAI-1 (U/mL)                           | 11.0 (7.8-21.2)                  | 16.7 (2.7-87.7)                      | 0.5161        |
| D-dimer (ng/mL)                        | 5,903 (222-6,917)                | 16,639 (1,376-20,000)                | <b>0.0112</b> |
| Fibrinogen (mg/dL)                     | 289 (281-525)                    | 167.5 (60-636)                       | <b>0.0367</b> |
| PT (sec)                               | 14.5 (13.8-15.5)                 | 17.0 (14.0-27.0)                     | <b>0.0435</b> |
| PTT (sec)                              | 28 (24-34)                       | 31 (24-200)                          | 0.3612        |
| WBC count (x 10 <sup>3</sup> /μL)      | 0.9 (0.8-0.9)                    | 3.3 (0.6-79.8)                       | <b>0.0085</b> |
| Peripheral blood blast %               | 17 (2.6-77)                      | 75 (7.5-89)                          | 0.1550        |
| Platelet count (x 10 <sup>3</sup> /μL) | 120 (51.3-131.6)                 | 29.9 (7.1-112.5)                     | <b>0.0011</b> |
| Creatinine (mg/dL)                     | 0.6 (0.5-1.7)                    | 0.9 (0.6-4.4)                        | 0.3194        |
| Hemoglobin (g/dL)                      | 9.4 (6.9-10.4)                   | 8.6 (3.6-12.4)                       | 0.8283        |
| LDH (Unit/L)                           | 140 (113-166)                    | 325 (133-1,898)                      | NA            |
| Bleeding (n, %)                        | 0 (0)                            | 7 (26.9)                             | 0.5575        |
| VTE (n, %)                             | 0 (0)                            | 3 (11.5)                             | >0.9999       |

Abbreviations: cfDNA, cell-free DNA; EVTF, extracellular vesicle tissue factor; H3Cit-DNA, citrullinated histone H3-DNA; LDH, lactate dehydrogenase; NA, not applicable; PAI-1, plasminogen activator inhibitor-1; PAP, plasmin-antiplasmin complex; PS+EVs, phosphatidylserine-positive extracellular vesicles; PT, prothrombin time; PTT, partial thromboplastin time; tPA, tissue plasminogen activator; VTE, venous thromboembolism; WBC, white blood cell



**Supplementary Table 4. Comparisons between non-APL AML patients with and without overt DIC.**

| Characteristics                        | No-DIC (n=162)<br>[median (range)] | Overt DIC (n=83)<br>[median (range)] | P value           |
|----------------------------------------|------------------------------------|--------------------------------------|-------------------|
| EVTF activity (pg/mL)                  | 1.1 (0-113)                        | 2.3 (0-4,086)                        | <b>0.0001</b>     |
| PS+EVs (nM)                            | 56.8 (5.9-939.4)                   | 53.6 (0-357.2)                       | 0.2732            |
| cfDNA (ng/mL)                          | 1,164 (338.7-7,783)                | 1,454 (446.2-20,109)                 | <b>0.0003</b>     |
| H3Cit-DNA complex (ng/mL)              | 32.1 (0-1,552)                     | 38.2 (0-934)                         | 0.1901            |
| PAP (ng/mL)                            | 5,110 (572.7-43,539)               | 5,432 (23.6-70,334)                  | 0.5631            |
| tPA (ng/mL)                            | 1.8 (0-38.8)                       | 2.0 (0-19.6)                         | 0.6449            |
| PAI-1 (U/mL)                           | 8.0 (0.2-101.9)                    | 8.9 (0.7-335.4)                      | 0.1146            |
| D-dimer (ng/mL)                        | 732 (135-20,000)                   | 2,182 (624-20,000)                   | <b>&lt;0.0001</b> |
| Fibrinogen (mg/dL)                     | 456 (181-1,101)                    | 455 (60-795)                         | 0.4014            |
| PT (sec)                               | 15.0 (12.9-47.0)                   | 16.9 (14.0-62.4)                     | <b>&lt;0.0001</b> |
| PTT (sec)                              | 33 (19-88)                         | 36 (21-61)                           | <b>0.0002</b>     |
| WBC count (x 10 <sup>3</sup> /μL)      | 10.3 (0.4-277.3)                   | 42.0 (0.6-435.9)                     | <b>&lt;0.0001</b> |
| Peripheral blood blast cell (%)        | 52 (0-95)                          | 72 (2.1-96)                          | <b>0.0012</b>     |
| Platelet count (x 10 <sup>3</sup> /μL) | 66.4 (3.4-862.4)                   | 30.5 (5.7-132.8)                     | <b>&lt;0.0001</b> |
| Creatinine (mg/dL)                     | 0.9 (0.4-3.2)                      | 1.1 (0.5-3.0)                        | <b>0.0343</b>     |
| Hemoglobin (g/dL)                      | 9.0 (2.9-15.1)                     | 8.7 (3.4-12.8)                       | 0.3687            |
| LDH (Unit/L)                           | 360 (109-3,594)                    | 593.5 (131-5,469)                    | <b>&lt;0.0001</b> |
| Bleeding (n, %)                        | 14 (8.6)                           | 15 (18.1)                            | <b>0.0373</b>     |
| VTE (n, %)                             | 17 (10.5)                          | 12 (14.5)                            | 0.4054            |

Abbreviations: cfDNA, cell-free DNA; EVTF, extracellular vesicle tissue factor; H3Cit-DNA, citrullinated histone H3-DNA; LDH, lactate dehydrogenase; PAI-1, plasminogen activator inhibitor-1; PAP, plasmin-antiplasmin complex; PS+EVs, phosphatidylserine-positive extracellular vesicles; PT, prothrombin time; PTT, partial thromboplastin time; tPA, tissue plasminogen activator; VTE, venous thromboembolism; WBC, white blood cell

**Supplementary Table 5. Comparisons between ALL patients with and without overt DIC.**

| Characteristics                   | No-DIC (n=42)<br>[median (range)] | Overt DIC (n=34)<br>[median (range)] | P value           |
|-----------------------------------|-----------------------------------|--------------------------------------|-------------------|
| EVTF activity (pg/mL)             | 0.7 (0-37.5)                      | 0.5 (0-52.4)                         | 0.1064            |
| PS+EVs (nM)                       | 57.7 (2.7-123.2)                  | 36.3 (4.5-132.4)                     | <b>0.0476</b>     |
| cfDNA (ng/mL)                     | 1,593 (767.4-22,157)              | 1,677 (116.4-29,325)                 | 0.8407            |
| H3Cit-DNA complex (ng/mL)         | 18.9 (0-240.1)                    | 19.7 (0-1,607)                       | 0.7649            |
| PAP (ng/mL)                       | 3,563 (125.4-60,381)              | 7677 (561.5-115,720)                 | <b>0.0007</b>     |
| tPA (ng/mL)                       | 0.5 (0-7.5)                       | 0.5 (0-2.4)                          | 0.3581            |
| PAI-1 (U/mL)                      | 10.0 (1.4-57.7)                   | 8.8 (0.4-69.6)                       | 0.3103            |
| D-dimer (ng/mL)                   | 1,045 (233-11,918)                | 1,970 (566-16,414)                   | <b>0.0024</b>     |
| Fibrinogen (mg/dL)                | 401.5 (170.0-856.0)               | 374.0 (184.0-687.0)                  | 0.5694            |
| PT (sec)                          | 14.4 (12.7-19.2)                  | 15.0 (12.8-21.6)                     | 0.0963            |
| PTT (sec)                         | 32 (24-40)                        | 33 (25-43)                           | 0.2146            |
| WBC count (x 10 <sup>3</sup> /μL) | 18.3 (0.7-204.6)                  | 11.7 (0.1-357.0)                     | 0.3425            |
| Peripheral blood blast cell (%)   | 60.5 (1.6-94)                     | 64 (2.1-97)                          | 0.8666            |
| Platelet (x 10 <sup>3</sup> /μL)  | 80.0 (12.6-377.3)                 | 23.8 (7.9-97.9)                      | <b>&lt;0.0001</b> |
| Creatinine (mg/dL)                | 0.9 (0.4-2.1)                     | 0.9 (0.4-2.2)                        | 0.7363            |
| Hemoglobin (g/dL)                 | 9.5 (6.6-17.9)                    | 8.1 (4.6-11.7)                       | <b>0.0002</b>     |
| LDH (Unit/L)                      | 481 (119-2,563)                   | 476.5 (123-6,374)                    | 0.6532            |
| Bleeding (n, %)                   | 0 (0)                             | 3 (8.8)                              | 0.0851            |
| VTE (n, %)                        | 3 (7.1)                           | 1 (2.9)                              | 0.6235            |

Abbreviations: cfDNA, cell-free DNA; EVTF, extracellular vesicle tissue factor; H3Cit-DNA, citrullinated histone H3-DNA; LDH, lactate dehydrogenase; PAI-1, plasminogen activator inhibitor-1; PAP, plasmin-antiplasmin complex; PS+EVs, phosphatidylserine-positive extracellular vesicles; PT, prothrombin time; PTT, partial thromboplastin time; tPA, tissue plasminogen activator; VTE, venous thromboembolism; WBC, white blood cell

**Supplementary Table 6. Characteristics of acute leukemia patients with and without bleeding.**

| Variable                                  | No Bleeding (n=317) | Bleeding (n=41)      | P value      |
|-------------------------------------------|---------------------|----------------------|--------------|
| <b>Age at Diagnosis [median, (range)]</b> | 59 (19-89)          | 57 (30-75)           | 0.841        |
| <b>Sex (n, %)</b>                         |                     |                      |              |
| Male                                      | 175 (56.1)          | 28 (60.9)            | 0.541        |
| <b>Race (n, %)</b>                        |                     |                      |              |
| Non-Hispanic White                        | 232 (74.4)          | 32 (69.6)            | 0.502        |
| Black                                     | 70 (22.4)           | 11 (23.9)            |              |
| Other/Hispanic or Latino                  | 10 (3.2)            | 3 (6.5)              |              |
| <b>Body mass index (n, %)</b>             | 31 (7.4)            | 30.1 (8.1)           | 0.295        |
| <b>Parameters [median (range)]</b>        |                     |                      |              |
| EVTF activity (pg/mL)                     | 1.1 (0-695.6)       | 1.9 (0-149.5)        | 0.111        |
| PS+EVs (nM)                               | 54.6 (0-939.4)      | 49.9 (4.5-357.2)     | 0.375        |
| cfDNA (ng/mL)                             | 1,226 (116-29,325)  | 1,341 (463-14,766)   | 0.124        |
| H3Cit-DNA complex (ng/mL)                 | 50(0-934)           | 22 (0-436)           | 0.141        |
| PAP (ng/mL)                               | 5,014 (24-115,720)  | 6,251 (1,181-43,539) | 0.091        |
| tPA (ng/mL)                               | 0.7 (0-38.8)        | 1.4 (0-12.6)         | 0.476        |
| PAI-1 (U/mL)                              | 9.1 (0.4-335.4)     | 9.5 (0.2-87.7)       | 0.208        |
| D-dimer (ng/mL)                           | 1,288 (135-20,000)  | 2,182 (212-20,000)   | <b>0.039</b> |
| Fibrinogen (mg/dL)                        | 421 (60-1,101)      | 441 (60-722)         | 0.382        |
| PT (sec)                                  | 15.1 (12.7-62.4)    | 16.0 (13.0-27.0)     | <b>0.027</b> |
| PTT (sec)                                 | 33 (19-200)         | 33 (24-51)           | 0.807        |
| WBC count (x 10 <sup>3</sup> /μL)         | 12.1 (0.1-435.9)    | 19.0 (0.9-136.0)     | 0.148        |
| Peripheral blood blast cell (%)           | 60 (0-97)           | 70 (0-91)            | 0.477        |
| Platelet (x 10 <sup>3</sup> /μL)          | 47.7 (3.4-862.4)    | 35.0 (11.1-285.2)    | 0.114        |
| Creatinine (mg/dL)                        | 0.9 (0.4-3.2)       | 0.8 (0.4-4.4)        | 0.977        |
| Hemoglobin (g/dL)                         | 8.7 (2.9-17.9)      | 8.5 (3.8-13.6)       | 0.111        |
| LDH (Unit/L)                              | 404 (110-6,374)     | 539 (109-4,714)      | <b>0.006</b> |
| <b>History of Bleeding (n, %)</b>         |                     |                      |              |
| Yes                                       | 4 (1.3%)            | 1 (2.2%)             | 1.261        |

**Supplementary Table 6. Characteristics of acute leukemia patients with and without bleeding. (continued)**

| Variable                    | No Bleeding (n=317) | Bleeding (n=41) | P value |
|-----------------------------|---------------------|-----------------|---------|
| <b>Comorbidities (n, %)</b> |                     |                 |         |
| None                        | 114 (36.5)          | 19 (41.3)       | 0.523   |
| 1                           | 78 (25)             | 8 (17.4)        |         |
| ≥2                          | 120 (38.5)          | 19 (41.3)       |         |

Abbreviations: cfDNA, cell-free DNA; EVTF, extracellular vesicle tissue factor; H3Cit-DNA, citrullinated histone H3-DNA; LDH, lactate dehydrogenase; PAI-1, plasminogen activator inhibitor-1; PAP, plasmin-antiplasmin complex; PS+EVs, phosphatidylserine-positive extracellular vesicles; PT, prothrombin time; PTT, partial thromboplastin time; tPA, tissue plasminogen activator; WBC, white blood cell

**Supplementary Table 7. Characteristics of acute leukemia patients with and without venous thromboembolism.**

| Variable                                 | No VTE (n=321)     | VTE (n=37)         | P value      |
|------------------------------------------|--------------------|--------------------|--------------|
| <b>Age at Diagnosis [median (range)]</b> | 59 (19-89)         | 54 (20-72)         | 0.135        |
| <b>Sex (n, %)</b>                        |                    |                    |              |
| Male                                     | 185 (58.2)         | 18 (45.0)          | 0.113        |
| <b>Race (n, %)</b>                       |                    |                    |              |
| Non-Hispanic White                       | 233 (73.3)         | 31 (77.5)          | 0.423        |
| Black                                    | 72 (22.6)          | 9 (22.5)           |              |
| Other/Hispanic or Latino                 | 13 (4.1)           | 0 (0)              |              |
| <b>Body mass index (n, %)</b>            | 30.9 (7.6)         | 31.3 (6.3)         | 0.426        |
| <b>Parameters [median (range)]</b>       |                    |                    |              |
| EVTF activity (pg/mL)                    | 1.1 (0-695.6)      | 1.8 (0-334.2)      | 0.156        |
| PS+EVs (nM)                              | 53.4 (0-939.4)     | 60.1 (7.7-326)     | 0.346        |
| cfDNA (ng/mL)                            | 1,263 (116-29,325) | 1,056 (430-6,114)  | 0.111        |
| H3Cit-DNA complex (ng/mL)                | 29 (0-1607)        | 27 (0-404)         | 0.419        |
| PAP (ng/mL)                              | 5,445 (24-115,720) | 4,288 (133-83,099) | 0.123        |
| tPA (ng/mL)                              | 0.8 (0-38.8)       | 0.2 (0-12.6)       | 0.067        |
| PAI-1 (U/mL)                             | 8.3 (0.2-335.4)    | 16.7 (2.6-71.6)    | <b>0.002</b> |
| D-dimer (ng/mL)                          | 1,383 (135-20,000) | 1,154 (233-20,000) | 0.943        |
| Fibrinogen (mg/dL)                       | 427 (60-1,100)     | 378 (98-882)       | 0.192        |
| PT (sec)                                 | 15.2 (12.7-62.4)   | 15.0 (13.6-24.6)   | 0.43         |
| PTT (sec)                                | 33 (19-200)        | 32 (24-50)         | 0.975        |
| WBC count (x 10 <sup>3</sup> /μL)        | 13.2 (0.1-358.1)   | 18.3 (0.9-435.9)   | 0.168        |
| Peripheral blood blast cell (%)          | 60 (0-97)          | 57 (6-96)          | 0.884        |
| Platelet (x 10 <sup>3</sup> /μL)         | 46 (3-862)         | 41 (10-353)        | 0.695        |
| Creatinine (mg/dL)                       | 0.9 (0.4-4.4)      | 0.9 (0.5-1.8)      | 0.589        |
| Hemoglobin (g/L)                         | 8.6 (2.9-17.9)     | 9.0 (3.6-12.8)     | 0.692        |
| LDH (Unit/L)                             | 424 (109-6,374)    | 401 (110-5,469)    | 0.965        |
| <b>History of VTE (n, %)</b>             |                    |                    |              |
| Yes                                      | 14 (4.4%)          | 3 (7.5%)           | 0.385        |

**Supplementary Table 7. Characteristics of acute leukemia patients with and without venous thromboembolism. (continued)**

| Variable                    | No VTE (n=321) | VTE (n=37) | P value |
|-----------------------------|----------------|------------|---------|
| <b>Comorbidities (n, %)</b> |                |            |         |
| None                        | 117 (36.8)     | 16 (40.0)  | 0.867   |
| 1                           | 76 (23.9)      | 10 (25.0)  |         |
| ≥2                          | 125 (39.3)     | 14 (35.0)  |         |

Abbreviations: cfDNA, cell-free DNA; EVTF, extracellular vesicle tissue factor; H3Cit-DNA, citrullinated histone H3-DNA; LDH, lactate dehydrogenase; PAI-1, plasminogen activator inhibitor-1; PAP, plasmin-antiplasmin complex; PS+EVs, phosphatidylserine-positive extracellular vesicles; PT, prothrombin time; PTT, partial thromboplastin time; tPA, tissue plasminogen activator; VTE, venous thromboembolism; WBC, white blood cell

**Supplementary Table 8. Biomarkers associated with bleeding and VTE risk in non-APL AML.**

| Biomarker                   | Bleeding#                 |              | VTE*                       |              |
|-----------------------------|---------------------------|--------------|----------------------------|--------------|
|                             | HR (95% CI)               | p-value      | HR (95% CI)                | p-value      |
| EVTF activity               | <b>2.35 (0.98 - 5.66)</b> | <b>0.057</b> | 1.27 (0.58 - 2.77)         | 0.546        |
| PS + EVs                    | 1.25 (0.61 - 2.56)        | 0.534        | 0.89 (0.43 - 1.85)         | 0.758        |
| cfDNA                       | 1.99 (0.97 - 4.07)        | 0.061        | 0.55 (0.28 - 1.08)         | 0.081        |
| H3Cit-DNA complexes         | 0.76 (0.40 - 1.46)        | 0.414        | 0.54 (0.27 - 1.09)         | 0.084        |
| PAP                         | 1.30 (0.64 - 2.62)        | 0.470        | 0.84 (0.41 - 1.70)         | 0.623        |
| tPA                         | 0.88 (0.42 - 1.82)        | 0.726        | <b>0.47 (0.24 - 0.93)</b>  | <b>0.029</b> |
| PAI-1                       | 1.32 (0.65 - 2.66)        | 0.444        | <b>4.18 (1.47 - 11.87)</b> | <b>0.007</b> |
| D-dimer                     | 1.32 (0.65 - 2.68)        | 0.435        | 1.01 (0.50 - 2.06)         | 0.979        |
| Fibrinogen                  | 0.66 (0.34 - 1.28)        | 0.217        | 0.74 (0.37 - 1.49)         | 0.402        |
| PT                          | 1.87 (0.85 - 4.13)        | 0.120        | 1.55 (0.67 - 3.56)         | 0.306        |
| PTT                         | 0.66 (0.34 - 1.29)        | 0.226        | 1.35 (0.61 - 3.00)         | 0.454        |
| WBC count                   | <b>2.42 (1.04 - 5.62)</b> | <b>0.041</b> | 0.94 (0.46 - 1.89)         | 0.857        |
| Peripheral blood blast cell | 1.08 (0.54 - 2.17)        | 0.827        | 0.97 (0.45 - 2.08)         | 0.928        |
| Platelet count              | 0.56 (0.29 - 1.09)        | 0.086        | 0.75 (0.37 - 1.50)         | 0.411        |
| Creatinine                  | 1.14 (0.49 - 2.63)        | 0.762        | 1.10 (0.50 - 2.43)         | 0.805        |
| Hemoglobin                  | 0.72 (0.38 - 1.39)        | 0.330        | 1.44 (0.67 - 3.10)         | 0.353        |
| LDH                         | <b>3.50 (1.34 - 9.17)</b> | <b>0.011</b> | 1.08 (0.52 - 2.22)         | 0.842        |

# Multivariable model was adjusted for age, sex, race/ethnicity,

\*Multivariable model was adjusted for age, sex, race/ethnicity, body mass index, history of venous thromboembolism and comorbidities.

Abbreviations: cfDNA, cell-free DNA; EVTF, extracellular vesicle tissue factor; H3Cit-DNA, citrullinated histone H3-DNA; LDH, lactate dehydrogenase; PAI-1, plasminogen activator inhibitor-1; PAP, plasmin-antiplasmin complex; PS+EVs, phosphatidylserine-positive extracellular vesicles; PT, prothrombin time; PTT, partial thromboplastin time; tPA, tissue plasminogen activator; WBC, white blood cell; 95% CI, 95% confidence interval



**Supplementary Table 9. Biomarkers associated with intracranial bleeding in patients with acute leukemia**

| Biomarker                   | Comparison            | Univariable          |               |
|-----------------------------|-----------------------|----------------------|---------------|
|                             |                       | HR (95% CI)          | p-value       |
| EVTF activity               | Tertile 2 and 3 vs. 1 | 6.16 ( 0.82 - 46.34) | <b>0.0774</b> |
| PS + EVs                    | Tertile 2 and 3 vs. 1 | 0.82 ( 0.26 - 2.54)  | 0.7259        |
| cfDNA                       | Tertile 2 and 3 vs. 1 | 2.62 ( 0.58 - 11.88) | 0.2114        |
| H3Cit-DNA complexes         | Tertile 2 and 3 vs. 1 | 1.11 ( 0.33 - 3.75)  | 0.8670        |
| PAP                         | Tertile 2 and 3 vs. 1 | 0.93 ( 0.28 - 3.06)  | 0.9063        |
| tPA                         | Tertile 2 and 3 vs. 1 | 0.29 ( 0.09 - 0.90)  | <b>0.0318</b> |
| PAI-1                       | Tertile 2 and 3 vs. 1 | 0.73 ( 0.24 - 2.28)  | 0.5930        |
| D-dimer                     | Tertile 2 and 3 vs. 1 | 2.56 ( 0.58 - 11.40) | 0.2171        |
| Fibrinogen                  | Tertile 2 and 3 vs. 1 | 0.27 ( 0.09 - 0.84)  | <b>0.0234</b> |
| PT                          | Tertile 2 and 3 vs. 1 | 1.67 ( 0.37 - 7.42)  | 0.5023        |
| PTT                         | Tertile 2 and 3 vs. 1 | 0.81 ( 0.25 - 2.69)  | 0.7357        |
| WBC count                   | Tertile 2 and 3 vs. 1 | 1.92 ( 0.43 - 8.64)  | 0.3931        |
| Peripheral blood blast cell | Tertile 2 and 3 vs. 1 | 3.90 ( 0.51 - 29.97) | 0.1912        |
| Platelet count              | Tertile 2 and 3 vs. 1 | 0.85 ( 0.27 - 2.63)  | 0.7729        |
| Creatinine                  | Tertile 2 and 3 vs. 1 | 3.45 ( 0.45 - 26.48) | 0.2330        |
| Hemoglobin                  | Tertile 2 and 3 vs. 1 | 0.55 ( 0.18 - 1.67)  | 0.2875        |
| LDH                         | Tertile 2 and 3 vs. 1 | 2.14 ( 0.48 - 9.61)  | 0.3212        |

Abbreviations: cfDNA, cell-free DNA; EVTF, extracellular vesicle tissue factor; H3Cit-DNA, citrullinated histone H3-DNA; LDH, lactate dehydrogenase; PAI-1, plasminogen activator inhibitor-1; PAP, plasmin-antiplasmin complex; PS+EVs, phosphatidylserine-positive extracellular vesicles; PT, prothrombin time; PTT, partial thromboplastin time; tPA, tissue plasminogen activator; WBC, white blood cell; 95% CI, 95% confidence interval
